# Supplementary material
Source: PubMed Central journal article supplement (PMC3755081)
Supplement: cc-12-2309-s01.pdf [file cc-12-2309-s01.pdf]

## **Supplemental Material to:**

**Marco Pieraccioli, Francesca Imbastari, Alexey Antonov,  
Gerry Melino, and Giuseppe Raschellà**

**Activation of miR200 by c-Myb depends on ZEB1  
expression and miR200 promoter methylation**

**Cell Cycle 2013; 12(14)**

**<http://dx.doi.org/10.4161/cc.25405>**

**<http://www.landesbioscience.com/journals/cc/article/25405>**

Supplementary Table 1. Correlation between c-MYB and mir200 in GSE22220 dataset ( ER-breast cancer patients)

| GENE (probe ID) | miRNA (probe ID)               | Pearson correlation | p value |
|-----------------|--------------------------------|---------------------|---------|
| c-MYB (7000594) | HSA-miR-200c<br>(ILMN_3167002) | 0.40                | 0.01    |
| c-MYB (7000594) | HSA-miR-200b<br>(ILMN_3168294) | 0.30                | 0.005   |
| c-MYB (7000594) | HSA-miR-200a<br>(ILMN_3167801) | 0.09                | 0.1     |
| c-MYB (7000594) | HSA-miR-141<br>(ILMN_3168064)  | 0.02                | 0.1     |
| c-MYB (7000594) | HSA-miR-429<br>(ILMN_3167806)  | -0.09               | 0.80    |

**Supplementary Table 2.** Primers used in the study.

| <b>Cloning</b>             | <b>Forward 5'-3'</b>                                        | <b>Reverse 5'-3'</b>                         |
|----------------------------|-------------------------------------------------------------|----------------------------------------------|
| human miR200ba429 promoter | ACCTGCTAGCGTGACCTTTCTTCT<br>CACGGAG                         | CAGGAGATCTCCTGGCACAGGAAG<br>TCAGTT           |
| human miR200c141 promoter  | ACGAACGCGTGCACCGAGATGAC<br>GGCTG                            | ACGACTCGAGAGATCCCTGGCTCC<br>CATC             |
| human ZEB1-A               | TAAGGATCCGCCACCATGAAAGT<br>TACAAATTA<br>TAATACTGTGGTAGAAACA | TGAGAGCTCTTCTGCACTTGGTTGT<br>GCATTCAAAG C    |
| human ZEB1-B               | GAAGAGCTCTCAAAAATTGCTGA<br>TTCAGTAAACCTACCAC                | GGCTTCATTTGTCTTTTCTTCAGAC<br>ACTTGCTCACTACTC |

  

| <b>Deletion</b>           | <b>Forward 5'-3'</b>                   | <b>Reverse 5'-3'</b>               |
|---------------------------|----------------------------------------|------------------------------------|
| Mut1 miR200ba429 promoter | ACCTGCTAGCGTCAGAGGTCACC<br>GGTGC       | CAGGAGATCTCCTGGCACAGGAAG<br>TCAGTT |
| Mut2 miR200ba429 promoter | ACCTGCTAGCTTCCAGCGAGAAG<br>AGAGCCAG    | CAGGAGATCTCCTGGCACAGGAAG<br>TCAGTT |
| Mut11 miR200c141 promoter | ACGAACGCGTGTCCCCTCTGGCG<br>GGAACA      | ACGACTCGAGAGATCCCTGGCTCC<br>CATC   |
| Mut2 miR200c141 promoter  | ACGAACGCGTGACTIONTGGACTCCA<br>CTGAGGGC | ACGACTCGAGAGATCCCTGGCTCC<br>CATC   |
| Mut3 miR200c141 promoter  | ACGAACGCGTTAAAGCCCCTTCG<br>TCTCC       | ACGACTCGAGAGATCCCTGGCTCC<br>CATC   |

  

| <b>Site directed mutagenesis</b> | <b>Forward 5'-3'</b>                        | <b>Reverse 5'-3'</b>                        |
|----------------------------------|---------------------------------------------|---------------------------------------------|
| miR200ba429 promoter MUT1        | GACTGTCCGGGGGAGGGAgTfTTc<br>GGGCAAGGGCAGTGG | CCACTGCCCTTGCCCgAAaAcTCCCT<br>CCCCGGGACAGTC |
| miR200ba429 promoter MUT2        | CACCGGTGCCCCAGGACgAtTTc<br>CCAGCGAGAAGAGA   | TCTCTTCTCGCTGGgAAaTcGTCCTG<br>GGGGCACCGGTG  |
| miR200c141 promoter MUT1         | AACTAAGAAGAGTAGTTtAaAaCC<br>GGAAGCGCAGACCTG | CAGGTCTGCGCTTCCGGtTtTaaACT<br>ACTTCTTAGTT   |
| miR200c141 promoter MUT2         | CAAGTCCCACCTCCTCTtAaaaCCC<br>TTGGGCTACCTGC  | GCAGGTAGCCCAAGGGtttTaAGAGG<br>AGGTGGGACTTG  |

**Supplementary Table 2.** Primers used in the study.

| <i>ChIP</i>                                | <i>Forward 5'-3'</i>   | <i>Reverse 5'-3'</i>    |
|--------------------------------------------|------------------------|-------------------------|
| hsa miR200ba429 promoter<br>Distal 1 and 2 | CAGACACCTGAGTGGGCATCAG | CCCAGAGGAAGAGCCCATAAT   |
| hsa miR200ba429 promoter<br>Proximal       | AGATTGGCCAGCGGGA       | CCTGGCACAGGAAGTCAG      |
| hsa miR200c141 promoter<br>Distal 1        | TCACAGGGCTATGGAACAGTGA | CACGTCAGCCAGCTCTTCAA    |
| hsa miR200c141 promoter 1<br>Distal 2      | GAGGGATTGAGCAACCCAATAG | GCCCTCAGTGGAGTCCAAGTC   |
| hsa miR200c141 promoter<br>Proximal        | CCAAGCCTTAGAGGAGGTGC   | GAGACGAAGGGGCTTTAAGG    |
| <i>ADA</i>                                 | CTCCTCCTTTTTGTCTTCCT   | GAAACTCAGTCTCCTTTGTCCCC |

  

| <b>qPCR</b>        | <b>Forward 5'-3'</b>           | <b>Reverse 5'-3'</b>             |
|--------------------|--------------------------------|----------------------------------|
| <i>c-myb</i>       | ACCATGACTATGATGGGCTGC          | TCCCCAAGTGACGCTTTCC              |
| <i>Desmoplakin</i> | GCTAAACGCCGCCAGGAT             | CCGCATGACTGTGTTGGAAT             |
| <i>Occludin</i>    | GCCGGTTCCTGAAGTGGTT            | CGAGGCTGCCTGAAGTCATC             |
| <i>Vimentin</i>    | CCAGCCGCAGCCTCTACG             | GCGAGAAGTCCACCGAGTCC             |
| <i>MRPL19</i>      | TCCTCGGGTCCAGGAGATT            | CAAGCTATCATCCAGCCGTTTC           |
| <i>Zeb1</i>        | GAACAGGACTCAAGACATCTCAG<br>TGT | GGTTTATTCTCTATCTTTTGCCGTA<br>TCT |
| <i>E-Cadherin</i>  | CCGCTGGCGTCTGTAGGAAGG          | GGCTCTTTGACCACCGCTCTCC           |
| <i>N-Cadherin</i>  | CTGTGGGAATCCGACGAATGG          | GTCATTGTCAGCCGCTTTAAGG           |

Lower case, red letters indicate mutated nucleotides. \* indicate biotinylated PCR primer.

**A**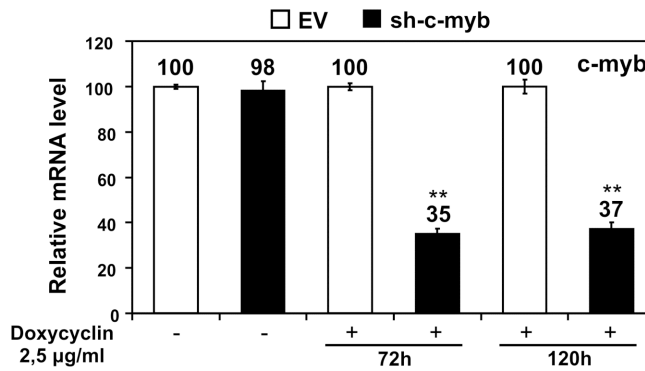**B**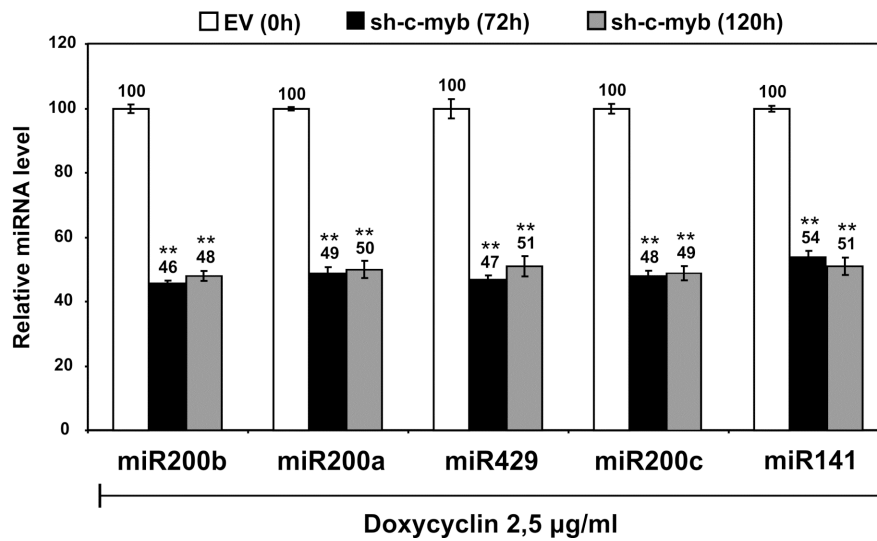

Supplementary Fig. 1. A: HEK293 cells were infected with lentiviral vector pLV-sh-c-myb (sh-c-myb) or with the empty vector pLV-EV (EV) and c-Myb expression was analyzed in sh-c-myb and EV infected cells after 72 and 120 hours of treatment with 2.5 mg/ml of doxycyclin by qRT-PCR. The relative mRNA level in untreated Ctrl cells was arbitrarily set to 100. B: qRT-PCR to analyze the expression level of each miRNA of the miR200 family was carried out in sh-c-myb-infected cells treated with doxycyclin for 72 and 120 h. The expression level of each miRNA in untreated sh-c-myb-infected cells was arbitrarily set to 100. Statistical significance was calculated by two-tailed Student's t test. \*\*  $p \leq 0.01$ . qRT-PCR analyses were carried out in triplicate in two independent experiments.

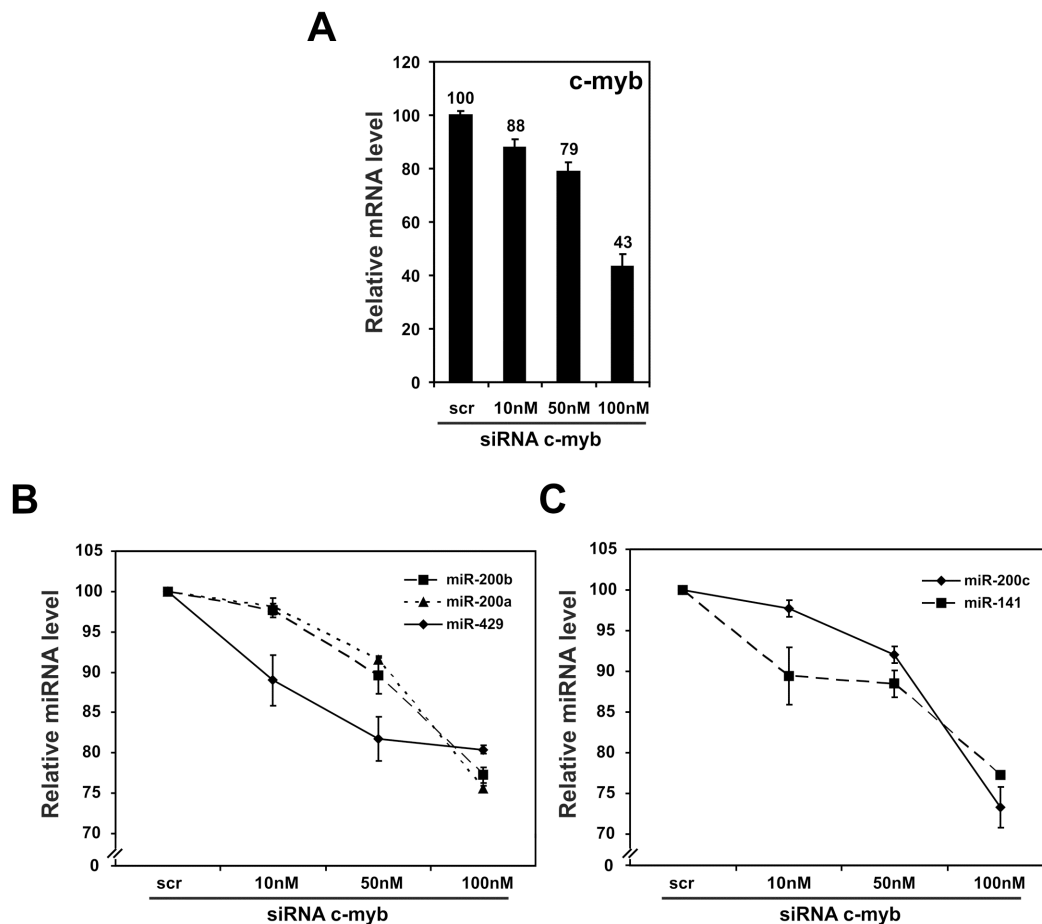

Supplementary Fig.2. A: c-myb mRNA levels were analyzed by qRT-PCR in MCF-7 cells transfected with siRNA directed against c-myb at the indicated concentrations. MCF-7 transfected with scrambled siRNA at 100 nM were used as control. B and C: qRT-PCR analysis to detect the levels of miR200b, miR200a, miR42 (B) , miR200c and miR141 (C) in MCF-7 cells transfected at the indicated concentrations of siRNA against c-myb. Scrambled: as in a. Analyses were carried out 72 hours after transfections. qRT-PCR analyses were carried out twice in triplicate. Data are reported  $\pm$  standard deviation. Statistical significance was calculated by Student's t test.

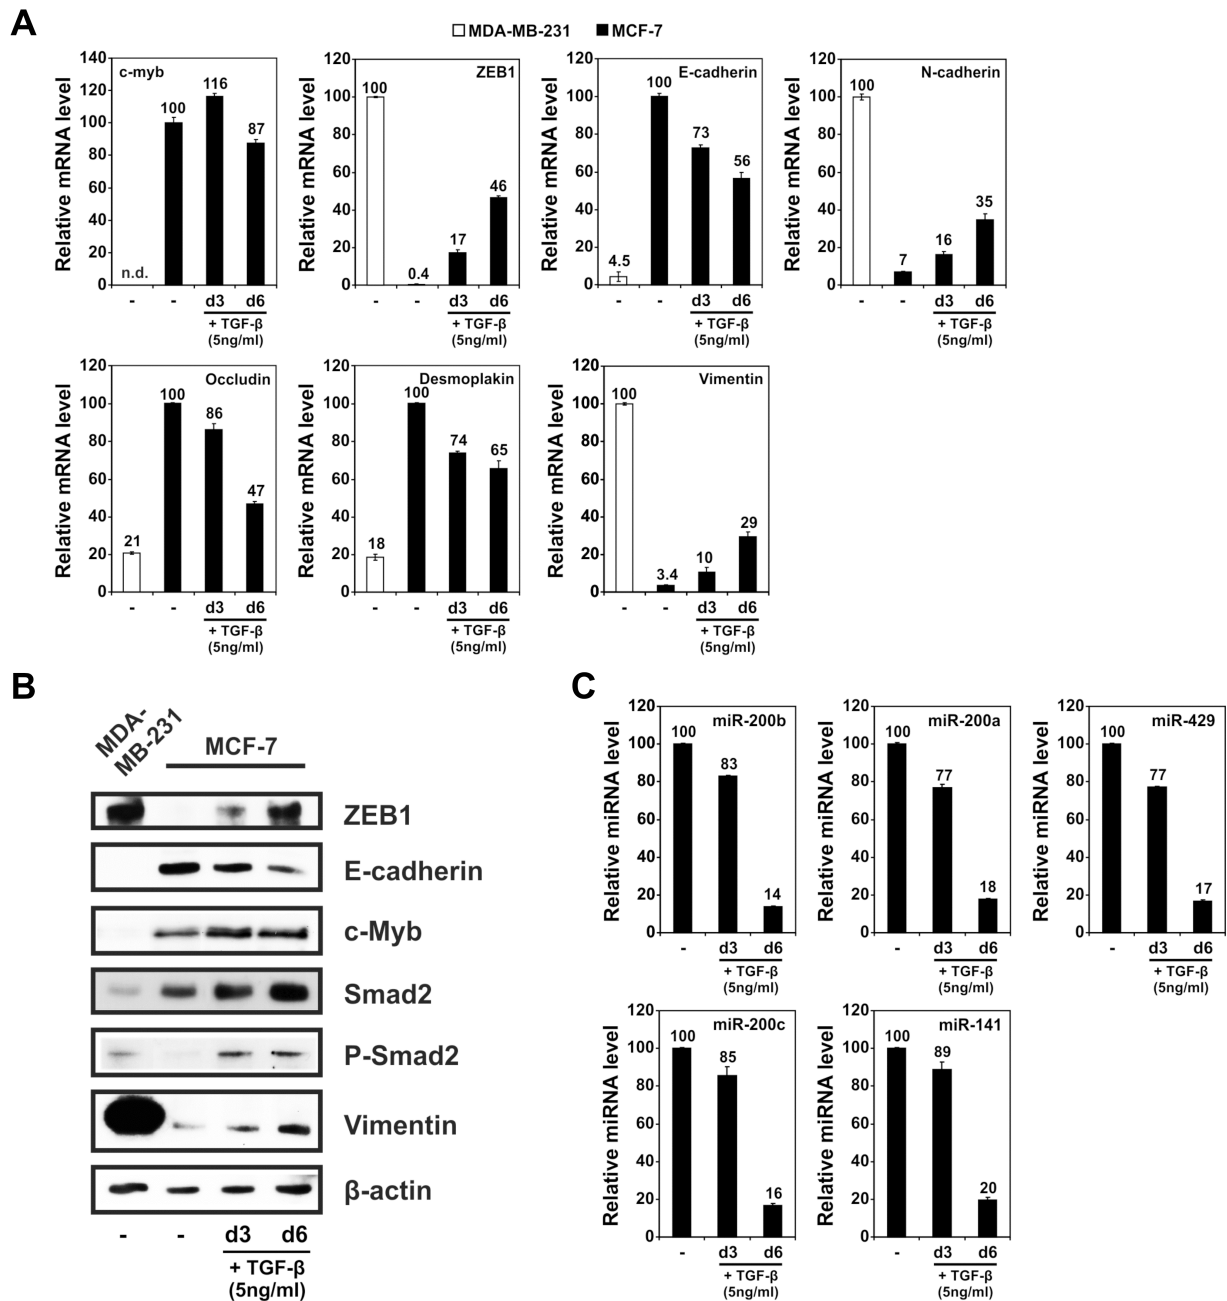

Supplementary Fig. 3. A: analysis of mRNA level for the indicated genes was carried out by qRT-PCR in MCF-7 cells treated with TGF- $\beta$  (5 ng/ml) for 3 and 6 days. B: western blot analysis was carried out to detect c-Myb, ZEB1, E-cadherin, and Vimentin in MCF-7 cells treated with TGF- $\beta$  as in A. C: miRNA levels for miR200b, miR200a, miR429, miR200c and miR141 were analyzed by qRT-PCR in MCF-7 cells treated with TGF- $\beta$  as in a. qRT-PCR analyses were carried out twice in triplicate. Data are reported  $\pm$  standard deviation. Statistical significance was calculated by Student's t test.
